# Supplementary material
Source: MDPI journal article supplement (https://www.mdpi.com/2073-8994/12/3/348)
Supplement: s1 [file s1]

## Supplementary Materials

Please check out this website: [https://github.com/omidek/FA\\_calculation](https://github.com/omidek/FA_calculation)
